# Supplementary material
Source: PubMed Central journal article supplement (PMC2911295)
Supplement: supp_M110.106005_jbc.M110.106005-2.pdf [file supp_M110.106005_jbc.M110.106005-2.pdf]

| Sequence identities between plant MFPs identified in GenBank |        |        |         |        |        |         |         |        |        |        |         |         |
|--------------------------------------------------------------|--------|--------|---------|--------|--------|---------|---------|--------|--------|--------|---------|---------|
|                                                              | ZmMFP2 | GmMFP2 | OsMFP2b | AtMFP2 | CsMFPa | HvMFP2a | OsMFP2a | AtAIM1 | ZmAIM1 | OsAIM1 | HvAIM1a | HvAIM1b |
| HvMFP2b                                                      | 68%    | 66%    | 64%     | 64%    | 64%    | 67%     | 68%     | 54%    | 54%    | 54%    | 53%     | 53%     |
| ZmMFP2                                                       |        | 75%    | 77%     | 72%    | 72%    | 88%     | 90%     | 55%    | 58%    | 59%    | 57%     | 56%     |
| GmMFP2                                                       |        |        | 66%     | 77%    | 74%    | 73%     | 75%     | 56%    | 57%    | 57%    | 55%     | 55%     |
| OsMFP2b                                                      |        |        |         | 66%    | 66%    | 76%     | 78%     | 54%    | 55%    | 55%    | 53%     | 54%     |
| AtMFP2                                                       |        |        |         |        | 75%    | 73%     | 74%     | 57%    | 56%    | 56%    | 55%     | 55%     |
| CsMFPa                                                       |        |        |         |        |        | 71%     | 72%     | 56%    | 57%    | 58%    | 57%     | 57%     |
| HvMFP2a                                                      |        |        |         |        |        |         | 89%     | 56%    | 57%    | 58%    | 56%     | 56%     |
| OsMFP2a                                                      |        |        |         |        |        |         |         | 55%    | 57%    | 59%    | 56%     | 56%     |
| AtAIM1                                                       |        |        |         |        |        |         |         |        | 67%    | 66%    | 65%     | 66%     |
| ZmAIM1                                                       |        |        |         |        |        |         |         |        |        | 88%    | 87%     | 86%     |
| OsAIM1                                                       |        |        |         |        |        |         |         |        |        |        | 88%     | 86%     |
| HvAIM1a                                                      |        |        |         |        |        |         |         |        |        |        |         | 90%     |

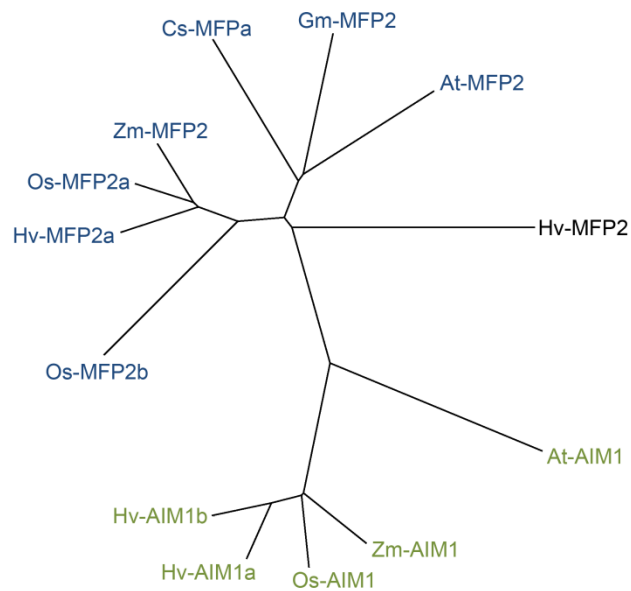

**Supplemental Figure S2.** MFP subfamilies among peroxisomal plant proteins.

A, Sequences identities among plant MFPs identified in GenBank. The included sequences are: *AtMFP2* (GenBank GI:145338207), *AtAIM1* (GI:75315624), *CsMFPa* (*Cucumis sativa*, GI:34922495), *HvMFP2b* (*Hordeum vulgare*, GI:151418576), *HvMFP2a* (GI:151419725), *HvAIM1a* (GI:151420676), *HvAIM1b* (GI:151418867), *OsMFP2a* (*Oryza sativa*, GenBank GI:115436429), *OsMFP2b* (GI:115436429), *OsAIM1* (GI:115445512), *ZmMFP2* (*Zea mays*, GI:195654912), *ZmAIM1* (GI:195654913). B. Phylogenetic tree including the *AtAIM1*- and *AtMFP2*-like proteins from the table.
