# Supplementary material
Source: PubMed Central journal article supplement (PMC2911295)
Supplement: supp_M110.106005_jbc.M110.106005-3.pdf [file supp_M110.106005_jbc.M110.106005-3.pdf]

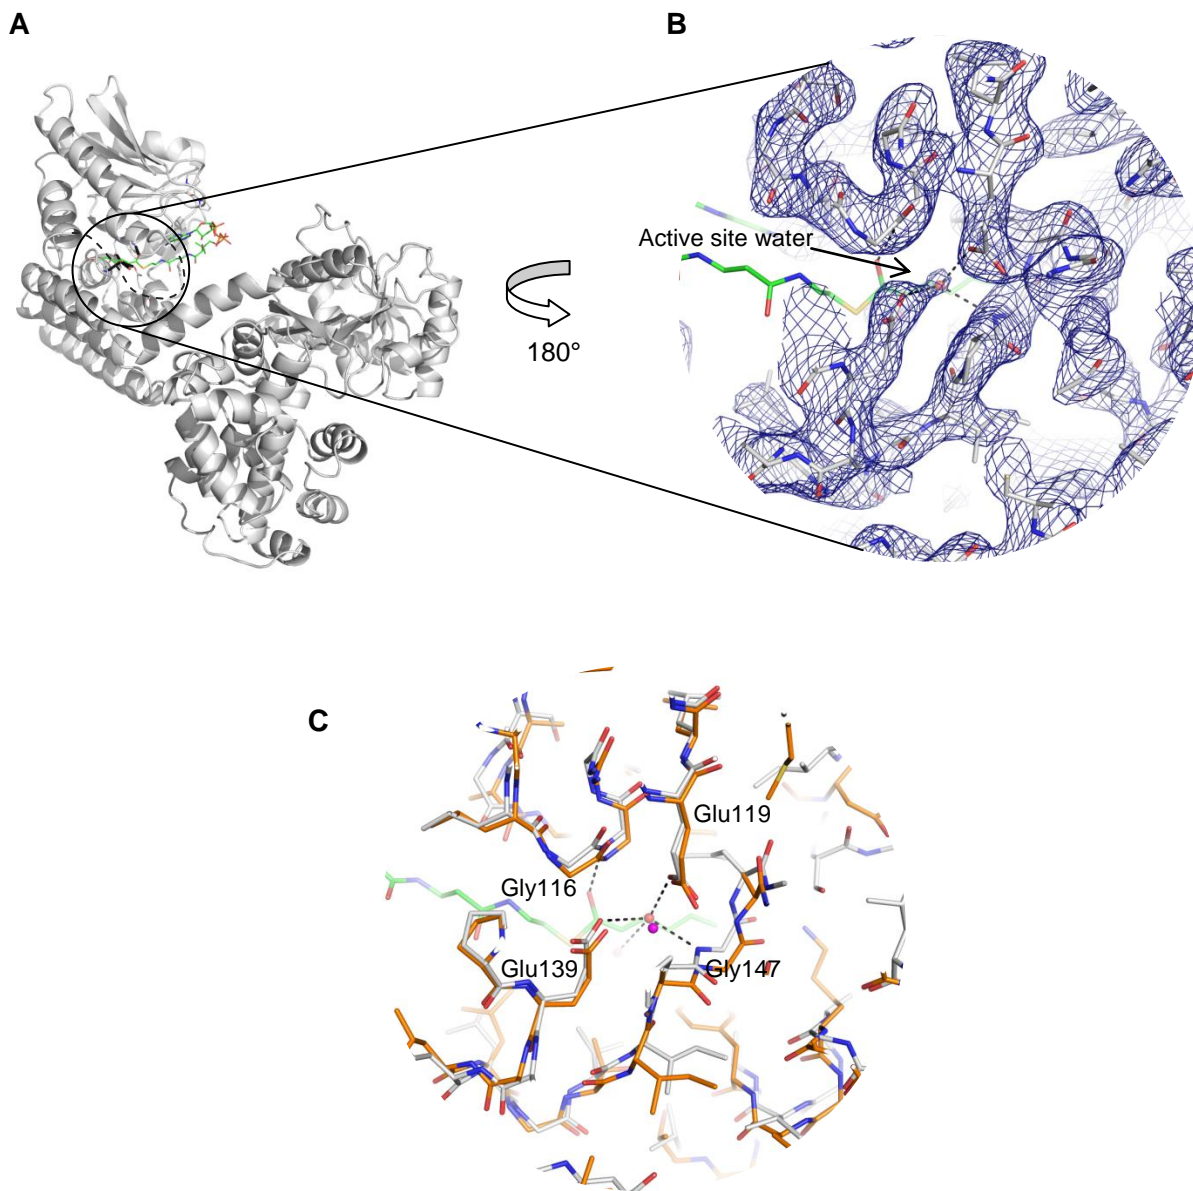

**Supplemental Figure S3.** Superposition of monofunctional mitochondrial *RnECH* and *AtMFP2-ECH* active sites.

*A*, Ribbon diagram of the *AtMFP2-ECH* domain with hexanoyl-CoA from mono-functional *RnECH* domain (Bell, A.F., *et al.* (2002) *Chem Biol* **9**, 1247-1255) imposed. The black dotted line is the disordered loop of the *AtMFP2-ECH* domain. *B*, The *AtMFP2-ECH* active site with the sigmaA weighted 2Fo-Fc electron density contoured at a  $1.2\sigma$  level. The hexanoyl-CoA substrate from the *RnECH* structure is imposed. The side chains labels are only displayed in subfigure *C* for clarity. Black dotted lines are hydrogen bonds. *C*, The superposition with *RnECH* domain in orange carbon atoms (magenta water, green substrate) and *AtMFP2* in the same orientation as in subfigure *B*.
